# Supplementary material for: Reanalyzing the spatial representativeness of snow depth at automated monitoring stations using airborne lidar data
Source: Copernicus journal article supplement (doi:10.5194/tc-18-3495-2024), 2024-08-08
Supplement: Supplementary file 1 [file tc-18-3495-2024-supplement.zip]

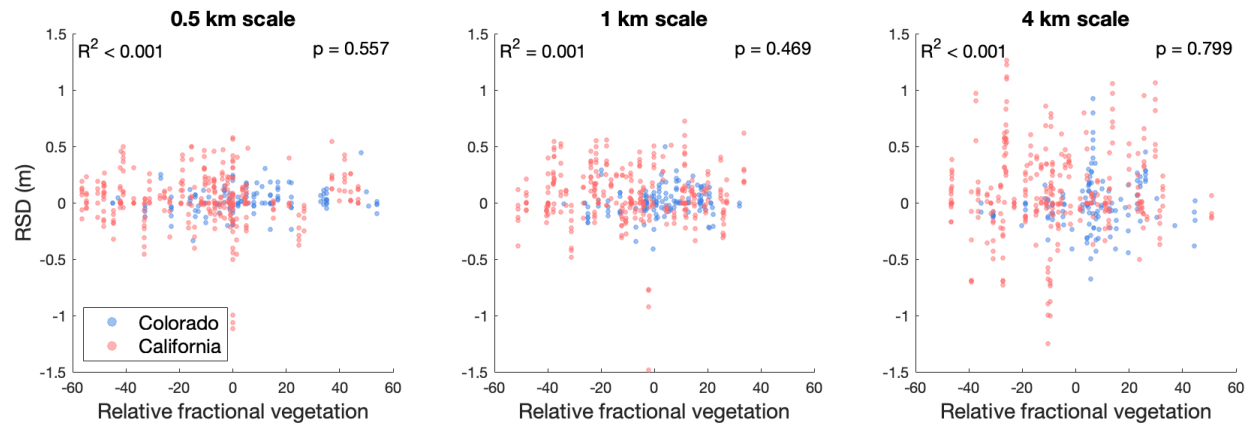

**Figure S1. Scatter plots showing the relationship between relative fractional vegetation and relative snow depth at the three spatial scales using 50 m SD data to represent the point value. The relationships are insignificant at all three scales.**

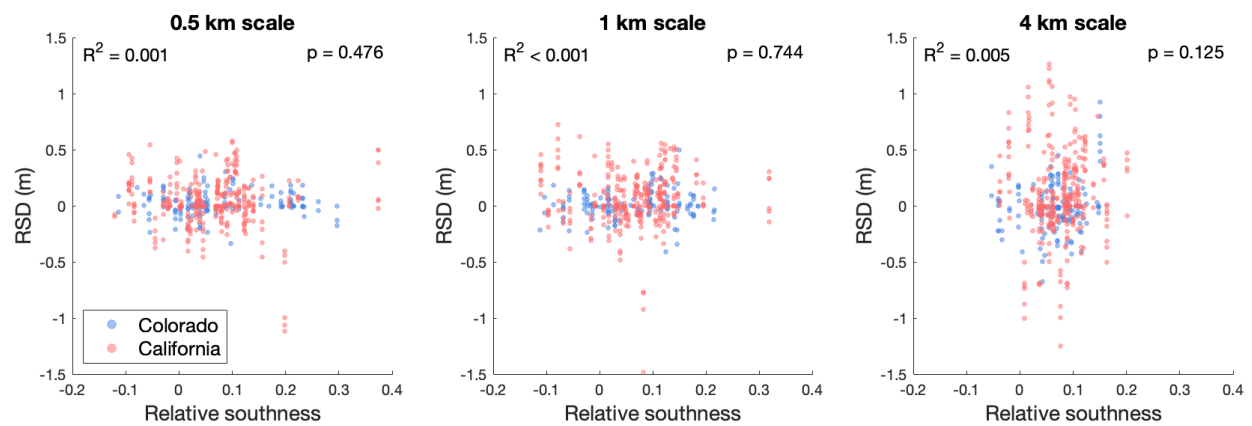

**Figure S2. Scatter plots showing the relationship between relative southness and relative snow depth at the three spatial scales using 50 m SD data to represent the point value. The relationships are insignificant at all three scales.**
