# Supplementary material for: Reanalyzing the spatial representativeness of snow depth at automated monitoring stations using airborne lidar data
Source: Copernicus journal article supplement (doi:10.5194/tc-18-3495-2024), 2024-08-08
Supplement: Supplementary file 2 [file tc-18-3495-2024-supplement.zip]

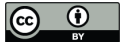

*Supplement of*

**Reanalyzing the spatial representativeness of snow depth at automated monitoring stations using airborne lidar data**

**Jordan N. Herbert et al.**

*Correspondence to:* Jordan N. Herbert ([jordan.herbert@colorado.edu](mailto:jordan.herbert@colorado.edu))

- [tc-18-3495-2024-supplement-title-page.pdf](#)
- [Herbert\\_supplemental\\_tables.xlsx](#)
- [Supp\\_figs.pdf](#)

The copyright of individual parts of the supplement might differ from the article licence.
